# Supplementary material for: Use of antihypertensive drugs and breast cancer risk: a two-sample Mendelian randomization study
Source: bioRxiv or medRxiv preprint supplement (doi:10.1101/2022.05.09.22274758), 2022-05-11
Supplement: Supplementary file [file media-1.pdf]

**Supplementary Table 1** Data resource used in the current study

| <b>Category</b>                                                                           | <b>Resource</b>                                                       | <b>URL</b>                                                                                                                                                                                                |
|-------------------------------------------------------------------------------------------|-----------------------------------------------------------------------|-----------------------------------------------------------------------------------------------------------------------------------------------------------------------------------------------------------|
| List of antihypertensive drugs                                                            | WHO Collaborating Centre for Drug Statistics Methodology              | <a href="https://www.whooc.no/">https://www.whooc.no/</a>                                                                                                                                                 |
| Identification of targeted gene                                                           | Drugbank                                                              | <a href="https://go.drugbank.com/">https://go.drugbank.com/</a>                                                                                                                                           |
| Genetic instruments for targeted gene expression in blood                                 | eQTLGen Consortium                                                    | <a href="https://www.eqtlgen.org/">https://www.eqtlgen.org/</a>                                                                                                                                           |
| Systolic blood pressure GWAS                                                              | GRASP                                                                 | <a href="https://grasp.nhlbi.nih.gov/FullResults.aspx">https://grasp.nhlbi.nih.gov/FullResults.aspx</a>                                                                                                   |
| Breast cancer GWAS                                                                        | Breast Cancer Association Consortium                                  | <a href="https://bcac.ccge.medschl.cam.ac.uk/bcacdata/oncoarray/oncoarray-and-combined-summary-result/">https://bcac.ccge.medschl.cam.ac.uk/bcacdata/oncoarray/oncoarray-and-combined-summary-result/</a> |
| MR association between targeted gene expression in other tissue and risk of breast cancer | Exploiting the GTEx resources to decipher the mechanisms at GWAS loci | <a href="https://zenodo.org/record/3942704#.Ya3sANDMKUn">https://zenodo.org/record/3942704#.Ya3sANDMKUn</a>                                                                                               |
| Differential gene expression                                                              | Expression Atlas                                                      | <a href="https://www.ebi.ac.uk/gxa/home">https://www.ebi.ac.uk/gxa/home</a>                                                                                                                               |

**Supplementary Table 2** Genes targeted by antihypertensive medications in DrugBank

| Drug Class        | Drug subclass                               | Medication Subclass                       | ATC Code                      | Drug name           | ATC Code         | Target Gene(s)                                     |                               |
|-------------------|---------------------------------------------|-------------------------------------------|-------------------------------|---------------------|------------------|----------------------------------------------------|-------------------------------|
| Antihypertensives | Anti-adrenergic agents, centrally-acting    | Rauwolfia alkaloids                       | C02AA                         | rescinnamine        | C02AA01          | ACE                                                |                               |
|                   |                                             |                                           |                               | reserpine           | C02AA02          | BIRC5, SLC18A1, SLC18A2                            |                               |
|                   |                                             |                                           |                               | rauwolfia alkaloids | C02AA04          | SLC18A2                                            |                               |
|                   |                                             |                                           |                               | deserpidine         | C02AA05          | SLC18A2                                            |                               |
|                   |                                             |                                           |                               | methoserpidine      | C02AA06          |                                                    |                               |
|                   |                                             |                                           |                               | bietaserpine        | C02AA07          |                                                    |                               |
|                   |                                             | Methyldopa                                | C02AB                         | methyldopa          | C02AB01, C02AB02 | ADRA2A, DDC                                        |                               |
|                   |                                             | Imidazoline receptor agonists             | C02AC                         | clonidine           | C02AC01          | ADRA2A, ADRA2C, ADRA1A, ADRA2B, ADRA1B, ADRA1D     |                               |
|                   |                                             |                                           |                               | guanfacine          | C02AC02          | ADRA2B, ADRA2A                                     |                               |
|                   |                                             |                                           |                               | tolonidine          | C02AC04          |                                                    |                               |
|                   |                                             |                                           |                               | moxonidine          | C02AC05          | ADRA2A, NISCH                                      |                               |
|                   |                                             | rilmnidine                                | C02AC06                       | ADRA2A              |                  |                                                    |                               |
|                   |                                             | Anti-adrenergic agents, ganglion-blocking | Sulfonium derivatives         | C02BA               | trimetaphan      | C02BA01                                            | CHRNA10                       |
|                   |                                             |                                           | Secondary and tertiary amines | C02BB               | mecamylamine     | C02BB01                                            | CHRNA2, CHRNA4, CHRN2, CHRNA7 |
|                   | Anti-adrenergic agents, peripherally-acting | Alpha-adrenoreceptor antagonists          | C02CA                         | prazosin            | C02CA01          | ADRA1A, ADRA1B, ADRA1D, KCNH2, ADRA2A, ADRA2B      |                               |
|                   |                                             |                                           |                               | indoramin           | C02CA02          | ADRA1A                                             |                               |
|                   |                                             |                                           |                               | trimazosin          | C02CA03          |                                                    |                               |
|                   |                                             |                                           |                               | doxazosin           | C02CA04          | ADRA1A, ADRA1B, ADRA1D, KCNH2, KCNH6, KCNH7        |                               |
|                   |                                             |                                           |                               | urapidil            | C02CA06          |                                                    |                               |
|                   |                                             | Guanidine derivatives                     | C02CC                         | betanidine          | C02CC01          | KCNJ1, ADRA2A, ADRA2B, ADRA2C, ADRB1, ADRB2, ADRB3 |                               |
| guanethidine      |                                             |                                           |                               | C02CC02             | SLC6A2           |                                                    |                               |
| guanoxan          |                                             |                                           |                               | C02CC03             |                  |                                                    |                               |
| debrisoquine      | C02CC04                                     | SLC6A2                                    |                               |                     |                  |                                                    |                               |

|      |                                            |                                                       |           |               |              |                                  |
|------|--------------------------------------------|-------------------------------------------------------|-----------|---------------|--------------|----------------------------------|
|      |                                            |                                                       |           | guanoclor     | C02CC05      |                                  |
|      |                                            |                                                       |           | guanazodine   | C02CC06      |                                  |
|      |                                            |                                                       |           | guanoxabenz   | C02CC07      |                                  |
|      | arteriolar smooth muscle, agents acting on | Thiazide derivatives                                  | C02DA     | diazoxide     | C02DA01      | CA1, CA2, KCNMA1, KCNJ11, ATP1A1 |
|      |                                            | Hydrazinophthalazine derivatives                      | C02DB     | dihydralazine | C02DB01      |                                  |
|      |                                            |                                                       |           | hydralazine   | C02DB02      | P4HA1, AOC3, HIF1A               |
|      |                                            |                                                       |           | endralazine   | C02DB03      |                                  |
|      |                                            |                                                       |           | cadralazine   | C02DB04      |                                  |
|      |                                            | Pyrimidine derivatives                                | C02DC     | minoxidil     | C02DC01      | PTGS1, REN, KCNJ1                |
|      |                                            | Nitroferricyanide derivatives                         | C02DD     | nitroprusside | C02DD01      | NPR1                             |
|      | Guanidine derivatives                      | C02DG                                                 | pinacidil | C02DG01       |              |                                  |
|      | other antihypertensives                    | Alkaloids, excl. rauwolfia                            | C02KA     | veratrum      | C02KA01      |                                  |
|      |                                            | Tyrosine hydroxylase inhibitors                       | C02KB     | metirosine    | C02KB01      | TH                               |
|      |                                            | MAO inhibitors                                        | C02KC     | pargyline     | C02KC01      | MAOB, MAOA                       |
|      |                                            | Serotonin antagonists                                 | C02KD     | ketanserin    | C02KD01      | HTR2A                            |
|      |                                            | Antihypertensives for pulmonary arterial hypertension | C02KX     | bosentan      | C02KX01      | EDNRB, EDNRA                     |
|      |                                            |                                                       |           | ambrisentan   | C02KX02      | EDNRB, EDNRA                     |
|      |                                            |                                                       |           | sitaxentan    | C02KX03      | EDNRB, EDNRA                     |
|      | macitentan                                 |                                                       |           | C02KX04       | EDNRB, EDNRA |                                  |
|      |                                            |                                                       | riociguat | C02KX05       | GUCY1A2      |                                  |
| ACEi | ACE inhibitors, plain                      | ACE inhibitors, plain                                 | C09AA     | captopril     | C09AA01      | MMP9, ACE, MMP2, LTA4H, BDKRB1   |
|      |                                            |                                                       |           | enalapril     | C09AA02      | ACE                              |
|      |                                            |                                                       |           | lisinopril    | C09AA03      | ACE, REN                         |
|      |                                            |                                                       |           | perindopril   | C09AA04      | ACE, SFRP4                       |
|      |                                            |                                                       |           | ramipril      | C09AA05      | ACE, BDKRB1                      |
|      |                                            |                                                       |           | quinapril     | C09AA06      | ACE                              |
|      |                                            |                                                       |           | benazepril    | C09AA07      | ACE                              |
|      |                                            |                                                       |           | cilazapril    | C09AA08      | ACE                              |

|      |                                                                 |                                                |       |                      |         |                                                                                                          |
|------|-----------------------------------------------------------------|------------------------------------------------|-------|----------------------|---------|----------------------------------------------------------------------------------------------------------|
|      |                                                                 |                                                |       | fosinopril           | C09AA09 | ACE                                                                                                      |
|      |                                                                 |                                                |       | trandolapril         | C09AA10 | ACE                                                                                                      |
|      |                                                                 |                                                |       | spirapril            | C09AA11 | ACE                                                                                                      |
|      |                                                                 |                                                |       | delapril             | C09AA12 |                                                                                                          |
|      |                                                                 |                                                |       | moexipril            | C09AA13 | ACE                                                                                                      |
|      |                                                                 |                                                |       | temocapril           | C09AA14 | ACE                                                                                                      |
|      |                                                                 |                                                |       | zofenopril           | C09AA15 | ACE                                                                                                      |
|      |                                                                 |                                                |       | imidapril            | C09AA16 |                                                                                                          |
| ARBs | Angiotensin ii receptor blockers (ARBs), plain                  | Angiotensin II receptor blockers (ARBs), plain | C09CA | losartan             | C09CA01 | AGTR1                                                                                                    |
|      |                                                                 |                                                |       | eprosartan           | C09CA02 | AGTR2                                                                                                    |
|      |                                                                 |                                                |       | valsartan            | C09CA03 | AGTR3                                                                                                    |
|      |                                                                 |                                                |       | irbesartan           | C09CA04 | AGTR1, JUN                                                                                               |
|      |                                                                 |                                                |       | tasosartan           | C09CA05 | AGTR1, AGTR2                                                                                             |
|      |                                                                 |                                                |       | candesartan          | C09CA06 | AGTR1                                                                                                    |
|      |                                                                 |                                                |       | telmisartan          | C09CA07 | AGTR1, PPARG                                                                                             |
|      |                                                                 |                                                |       | olmesartan medoxomil | C09CA08 | AGTR1                                                                                                    |
|      |                                                                 |                                                |       | azilsartan medoxomil | C09CA09 | AGTR2                                                                                                    |
|      |                                                                 |                                                |       | fimasartan           | C09CA10 | AGTR3                                                                                                    |
|      | Renin-inhibitors                                                |                                                | C09XA | remikiren            | C09XA01 | REN                                                                                                      |
|      |                                                                 |                                                |       | aliskiren            | C09XA02 | REN                                                                                                      |
| CCBs | Selective calcium channel blockers with mainly vascular effects | Dihydropyridine derivatives                    | C08CA | amlodipine           | C08CA01 | CACNA1I, CA1, CACNB1, CACNA1C, SMPD1, CACNA1B, CACNA2D3                                                  |
|      |                                                                 |                                                |       | felodipine           | C08CA02 | CALM1, CACNA1C, NR3C2, CACNA2D1, CACNA1H, TNNC1, CACNB2, CACNA1S, CACNA1D, CACNA2D2, PDE1B, PDE1A, TNNC2 |
|      |                                                                 |                                                |       | isradipine           | C08CA03 | CACNA1C, CACNA2D1, CACNA1H, CACNB2, CACNA1S, CACNA1D, CACNA2D2                                           |

|  |                                                                |                                                                       |       |               |         |                                                                                                                    |
|--|----------------------------------------------------------------|-----------------------------------------------------------------------|-------|---------------|---------|--------------------------------------------------------------------------------------------------------------------|
|  |                                                                |                                                                       |       | nicardipine   | C08CA04 | CHRM3, CHRM1, CHRM5, CHRM4, CALM1, CACNA1C, ADRA1A, CHRM2, ADRA1B, CACNA2D1, ADRA1D, CACNB2, CACNA1D, PDE1B, PDE1A |
|  |                                                                |                                                                       |       | nifedipine    | C08CA05 | CALM1, CACNA1C, NR1I2, CACNB2, CACNA1S, CACNA1D, KCND3, CACNA1G, CACNA1H, CACNA1I                                  |
|  |                                                                |                                                                       |       | nimodipine    | C08CA06 | CACNB1, CACNA1C, NR3C2, CACNB2, CACNA1S, CACNB4, CACNA1F, CACNB3, CACNA1D, AHR                                     |
|  |                                                                |                                                                       |       | nisoldipine   | C08CA07 | CACNA1C, CACNA2D1, CACNB2, CACNA1S, CACNA1D                                                                        |
|  |                                                                |                                                                       |       | nitrendipine  | C08CA08 | CACNA1C, CACNA2D1, CACNA1H, CACNB2, CACNA1S, CACNA1D, CACNA2D2                                                     |
|  |                                                                |                                                                       |       | lacidipine    | C08CA09 | CACNA1C, CACNA1D, CACNA1F, CACNA1S, CACNB1, CACNB2, CACNB3, CACNB4, CACNA1A                                        |
|  |                                                                |                                                                       |       | nilvadipine   | C08CA10 | CACNA1C, CACNA2D1, CACNB2, CACNA1S, CACNA1D, CACNA2D3                                                              |
|  |                                                                |                                                                       |       | manidipine    | C08CA11 | CACNA1C, CACNA1D, CACNA1F, CACNA1S, CACNB1, CACNB2, CACNB3, CACNB4, CACNA1A, CACNA1G, CACNA1H, CACNA1I             |
|  |                                                                |                                                                       |       | barnidipine   | C08CA12 |                                                                                                                    |
|  |                                                                |                                                                       |       | lercanidipine | C08CA13 | CACNG1                                                                                                             |
|  |                                                                |                                                                       |       | cilnidipine   | C08CA14 | CACNA1B, CACNA1C, CACNA1D, CACNA1F, CACNA1S, CACNB1, CACNB2, CACNB3, CACNB4, CACNA1A                               |
|  |                                                                |                                                                       |       | benidipine    | C08CA15 | CACNA1B, CACNA1C, CACNA1D, CACNA1F, CACNA1S, CACNB1, CACNB2, CACNB3, CACNB4, CACNA1A, CACNA1G, CACNA1H, CACNA1I    |
|  |                                                                |                                                                       |       | clevidipine   | C08CA16 | CACNA1C, CACNA1S, CACNA1F, CACNA1D                                                                                 |
|  |                                                                | Other selective calcium channel blockers with mainly vascular effects | C08CX | mibefradil    | C08CX01 | CACNA1I, CACNB1, CACNA1C, CACNA1G, CACNA1H, CACNB2, CACNA1S, CACNB4, CACNA1F, CACNB3, CACNA1D                      |
|  | Selective calcium channel blockers with direct cardiac effects | Phenylalkylamine derivatives                                          | C08DA | verapamil     | C08DA01 | KCNH2, CACNA1A, CACNA1C, CACNA1G, ADRA1A, ADRA1B, KCNJ11, ADRA1D, SLC6A4, CACNA1H, CACNA1B                         |
|  |                                                                |                                                                       |       | gallopamil    | C08DA02 |                                                                                                                    |
|  |                                                                | Benzothiazepine derivatives                                           | C08DB | diltiazem     | C08DB01 | CACNA1C, CACNG1                                                                                                    |
|  |                                                                |                                                                       | C08EA | fendiline     | C08EA01 |                                                                                                                    |

|              |                                        |                                              |       |             |         |                                                                              |
|--------------|----------------------------------------|----------------------------------------------|-------|-------------|---------|------------------------------------------------------------------------------|
|              | Non-selective calcium channel blockers | Phenylalkylamine derivatives                 |       | bepridil    | C08EA02 | KCNH2, CACNA1A, CALM1, KCNQ1, ATP1A1, CACNA1H, TNNC1, CACNA2D2, PDE1B, PDE1A |
|              |                                        | Other non-selective calcium channel blockers | C08EX | lidoflazine | C08EX01 |                                                                              |
|              |                                        |                                              |       | perhexiline | C08EX02 | KCNH2, CPT2, CPT1A                                                           |
| Beta blocker | Beta blocking agents                   | Beta blocking agents, non-selective          | C07AA | alprenolol  | C07AA01 | ADRB1, HTR1A, ADRB2, ADRB3                                                   |
|              |                                        |                                              |       | oxprenolol  | C07AA02 | ADRB1, ADRB2, ADRB3                                                          |
|              |                                        |                                              |       | pindolol    | C07AA03 | ADRB1, HTR1A, ADRB2, HTR1B, ADRB3                                            |
|              |                                        |                                              |       | propranolol | C07AA05 | ADRB1, HTR1A, ADRB2, HTR1B, ADRB3                                            |
|              |                                        |                                              |       | timolol     | C07AA06 | ADRB1, ADRB2, E                                                              |
|              |                                        |                                              |       | sotalol     | C07AA07 | KCNH2, ADRB1, ADRB2                                                          |
|              |                                        |                                              |       | nadolol     | C07AA12 | ADRB1, ADRB2                                                                 |
|              |                                        |                                              |       | mepindolol  | C07AA14 |                                                                              |
|              |                                        |                                              |       | carteolol   | C07AA15 | ADRB1, ADRB2                                                                 |
|              |                                        |                                              |       | tertatolol  | C07AA16 |                                                                              |
|              |                                        |                                              |       | bopindolol  | C07AA17 | ADRB1, HTR1A, ADRB2, HTR1B, ADRB3                                            |
|              |                                        |                                              |       | bupranolol  | C07AA19 | ADRB1, ADRB2, ADRB3                                                          |
|              |                                        |                                              |       | penbutolol  | C07AA23 | ADRB1, HTR1A, ADRB2, HTR1B                                                   |
|              | cloranolol                             | C07AA27                                      |       |             |         |                                                                              |
|              | Beta blocking agents                   | Beta blocking agents, selective              | C07AB | practolol   | C07AB01 | ADRB1                                                                        |
|              |                                        |                                              |       | metoprolol  | C07AB02 | ADRB1, ADRB2                                                                 |
|              |                                        |                                              |       | atenolol    | C07AB03 | ADRB1, ADRB2                                                                 |
|              |                                        |                                              |       | acebutolol  | C07AB04 | ADRB1, ADRB2                                                                 |
|              |                                        |                                              |       | betaxolol   | C07AB05 | ADRB1, ADRB3                                                                 |
|              |                                        |                                              |       | bevantolol  | C07AB06 | ADRB1, ADRA1A, ADRB2                                                         |
|              |                                        |                                              |       | bisoprolol  | C07AB07 | ADRB1, ADRB2                                                                 |
|              |                                        |                                              |       | celiprolol  | C07AB08 | ADRB1, ADRA2A, ADRA2C, ADRA2B, ADRB2, ADRB3                                  |
|              |                                        |                                              |       | esmolol     | C07AB09 | ADRB1                                                                        |
| epanolol     |                                        |                                              |       | C07AB10     |         |                                                                              |
| s-atenolol   | C07AB11                                |                                              |       |             |         |                                                                              |
| nebivolol    | C07AB12                                | ADRB1, ADRB2, ADRB3                          |       |             |         |                                                                              |
| talinolol    | C07AB13                                |                                              |       |             |         |                                                                              |
| landiolol    | C07AB14                                |                                              |       |             |         |                                                                              |

|                        |                                        |                                |             |                     |                                          |                                                                                                                                  |
|------------------------|----------------------------------------|--------------------------------|-------------|---------------------|------------------------------------------|----------------------------------------------------------------------------------------------------------------------------------|
|                        | Beta blocking agents                   | Alpha and beta blocking agents | C07AG       | labetalol           | C07AG01                                  | ADRB1, ADRB2, ADRA1A, ADRA1B, ADRA1D                                                                                             |
|                        |                                        |                                |             | carvedilol          | C07AG02                                  | KCNH2, VEGFA, ADRB1, NDUFC2, ADRA2A, ADRA2C, ADRA1A, ADRA2B, ADRA1B, ADRB2, ADRA1D, NPPB, SELE, GJA1, VCAM1, HIF1A, KCNJ4, KCNJ2 |
| Diuretic               | Low-ceiling diuretics, thiazides       | Thiazides, plain               | C03AA       | bendroflumethiazide | C03AA01                                  | CA1, CA2, SLC12A3, CA4, KCNMA1                                                                                                   |
|                        |                                        |                                |             | hydroflumethiazide  | C03AA02                                  | CA1, CA2, SLC12A1, CA4, KCNMA1, ATP1A1, CA12, CA9, CA7                                                                           |
|                        |                                        |                                |             | hydrochlorothiazide | C03AA03                                  | SLC12A3, KCNMA1                                                                                                                  |
|                        |                                        |                                |             | chlorothiazide      | C03AA04                                  | CA1, CA2, SLC12A3                                                                                                                |
|                        |                                        |                                |             | polythiazide        | C03AA05                                  | SLC12A3                                                                                                                          |
|                        |                                        |                                |             | trichlormethiazide  | C03AA06                                  | CA1, CA2, SLC12A3, CA4, ATP1A1                                                                                                   |
|                        |                                        |                                |             | cyclopenthiazide    | C03AA07                                  |                                                                                                                                  |
|                        |                                        |                                |             | methyclothiazide    | C03AA08                                  | CA1, CA2, SLC12A1, CA4                                                                                                           |
|                        |                                        |                                |             | cyclothiazide       | C03AA09                                  | FXYD2, CA1, CA2, SFRP4, CA13, CA14, CA3, CA4, CA5A, CA5B, CA6, CA7, CA9                                                          |
|                        |                                        |                                |             | mebutizide          | C03AA13                                  |                                                                                                                                  |
|                        | Low-ceiling diuretics, excl. thiazides | Sulfonamides, plain            | C03BA       | quinethazone        | C03BA02                                  | CA1, SLC12A2, CA2, SLC12A3, SLC12A1                                                                                              |
|                        |                                        |                                |             | clopamide           | C03BA03                                  |                                                                                                                                  |
|                        |                                        |                                |             | chlortalidone       | C03BA04                                  | CA1, SLC12A1                                                                                                                     |
|                        |                                        |                                |             | mefruside           | C03BA05                                  |                                                                                                                                  |
|                        |                                        |                                |             | clofenamide         | C03BA07                                  |                                                                                                                                  |
|                        |                                        |                                |             | metolazone          | C03BA08                                  | SLC12A3                                                                                                                          |
|                        |                                        |                                |             | meticrane           | C03BA09                                  |                                                                                                                                  |
|                        |                                        |                                |             | xipamide            | C03BA10                                  |                                                                                                                                  |
|                        |                                        |                                |             | indapamide          | C03BA11                                  | SLC12A3                                                                                                                          |
|                        |                                        |                                |             | clorexolone         | C03BA12                                  |                                                                                                                                  |
| fenquizone             |                                        |                                |             | C03BA13             |                                          |                                                                                                                                  |
|                        | Mercurial diuretics                    | C03BC                          | mersalyl    | C03BC01             | SLC16A1, AQP1, ALPL                      |                                                                                                                                  |
|                        | Xanthine derivatives                   | C03BD                          | theobromine | C03BD01             | ADORA1, PDE4B, ADORA2A                   |                                                                                                                                  |
|                        | Other low-ceiling diuretics            | C03BX                          | cicletanine | C03BX03             |                                          |                                                                                                                                  |
| High-ceiling diuretics | Sulfonamides, plain                    | C03CA                          | furosemide  | C03CA01             | CA2, SLC12A1, GPR35                      |                                                                                                                                  |
|                        |                                        |                                | bumetanide  | C03CA02             | SLC12A5, SLC12A2, SLC12A1, SLC12A4, CFTR |                                                                                                                                  |

|  |                          |                                |       |                      |         |                                                                                                                                                                                                                                                                                                                |
|--|--------------------------|--------------------------------|-------|----------------------|---------|----------------------------------------------------------------------------------------------------------------------------------------------------------------------------------------------------------------------------------------------------------------------------------------------------------------|
|  |                          |                                |       | piretanide           | C03CA03 | SLC12A1                                                                                                                                                                                                                                                                                                        |
|  |                          |                                |       | torasemide           | C03CA04 | SLC12A2, SLC12A1                                                                                                                                                                                                                                                                                               |
|  |                          | Aryloxyacetic acid derivatives | C03CC | etacrynic acid       | C03CC01 | SLC12A1, ATP1A1, GSTP1, LEF1                                                                                                                                                                                                                                                                                   |
|  |                          |                                |       | tienilic acid        | C03CC02 |                                                                                                                                                                                                                                                                                                                |
|  |                          | Pyrazolone derivatives         | C03CD | muzolimine           | C03CD01 |                                                                                                                                                                                                                                                                                                                |
|  |                          | Other high-ceiling diuretics   | C03CX | etozolin             | C03CX01 |                                                                                                                                                                                                                                                                                                                |
|  | Potassium-sparing agents | Aldosterone antagonists        | C03DA | spironolactone       | C03DA01 | AR, CACNA1A, CACNA1B, CACNA1C, CACNA1D, CACNA1E, CACNA1F, CACNA1G, CACNA1H, CACNA1I, CACNA1S, CACNA2D1, CACNA2D2, CACNA2D3, CACNA2D4, CACNB1, CACNB2, CACNB3, CACNB4, CACNG1, CACNG2, CACNG3, CACNG4, CACNG5, CACNG6, CACNG7, CACNG8, CYP11B2, CYP17A1, NR1I2, NR3C1, NR3C2, PGR, SHBG, SRD5A1, SRD5A2, SRD5A3 |
|  |                          |                                |       | potassium canrenoate | C03DA02 |                                                                                                                                                                                                                                                                                                                |
|  |                          |                                |       | canrenone            | C03DA03 |                                                                                                                                                                                                                                                                                                                |
|  |                          |                                |       | eplerenone           | C03DA04 | NR3C2                                                                                                                                                                                                                                                                                                          |
|  |                          | Other potassium-sparing agents | C03DB | amiloride            | C03DB01 | AOC1, ASIC1, ASIC2, PLAU, SCNN1A, SCNN1B, SCNN1D, SCNN1G, SLC9A1                                                                                                                                                                                                                                               |
|  |                          |                                |       | triamterene          | C03DB02 | SCNN1A, SCNN1B, SCNN1D, SCNN1G                                                                                                                                                                                                                                                                                 |
|  | Other diuretics          | Vasopressin antagonists        | C03XA | tolvaptan            | C03XA01 | AVPR1A, AVPR2                                                                                                                                                                                                                                                                                                  |
|  |                          |                                |       | conivaptan           | C03XA02 | AVPR1A, AVPR3                                                                                                                                                                                                                                                                                                  |



**Supplementary Table 3** MR association between drug target gene expression in blood and systolic blood pressure

| Gene     | Probe Chr | Probe_bp  | topSNP     | topSNP_chr | topSNP_bp | Effect_allele | Other_allele | Freq_Effect_allele | eQTL association |       |          |              | SBP association |       |          | MR association |       |          | HEIDI Test |      |
|----------|-----------|-----------|------------|------------|-----------|---------------|--------------|--------------------|------------------|-------|----------|--------------|-----------------|-------|----------|----------------|-------|----------|------------|------|
|          |           |           |            |            |           |               |              |                    | beta             | se    | p        | F_statistics | beta            | se    | p        | beta           | se    | p        | p_HEIDI    | nsnp |
| P4HA1    | 10        | 74811853  | rs6480668  | 10         | 74849326  | G             | A            | 0.07               | 0.183            | 0.016 | 3.35E-32 | 139.5        | 0.304           | 0.061 | 7.17E-07 | 1.655          | 0.362 | 4.82E-06 | 4.41E-02   | 3    |
| ACE      | 17        | 61576813  | rs4308     | 17         | 61559625  | A             | G            | 0.38               | 0.075            | 0.009 | 2.84E-17 | 71.5         | 0.273           | 0.031 | 3.11E-18 | 3.639          | 0.600 | 1.35E-09 | 1.10E-01   | 17   |
| SLC12A2  | 5         | 127472419 | rs17764730 | 5          | 127357526 | T             | C            | 0.22               | -0.186           | 0.009 | 3.2E-86  | 387.3        | -0.208          | 0.035 | 4.49E-09 | 1.119          | 0.199 | 1.85E-08 | 4.27E-02   | 20   |
| AOC1     | 7         | 150540153 | rs7806458  | 7          | 150476888 | G             | A            | 0.36               | 0.669            | 0.008 | 0.00E+00 | 6991.5       | 0.078           | 0.031 | 1.27E-02 | 0.117          | 0.047 | 1.28E-02 | 9.06E-02   | 20   |
| SCNN1D   | 1         | 1221612   | rs11804831 | 1          | 1194804   | C             | T            | 0.15               | -0.133           | 0.012 | 4.69E-30 | 129.7        | -0.161          | 0.041 | 6.90E-05 | 1.208          | 0.321 | 1.72E-04 | 1.13E-02   | 20   |
| SLC12A1  | 15        | 48540068  | rs964611   | 15         | 48597514  | A             | C            | 0.15               | 1.664            | 0.009 | 0.00E+00 | 37527.1      | -0.093          | 0.042 | 2.52E-02 | -0.056         | 0.025 | 2.53E-02 | 4.70E-01   | 20   |
| CA4      | 17        | 58237778  | rs34820870 | 17         | 58244021  | G             | T            | 0.03               | -0.462           | 0.021 | 6.1E-110 | 496.3        | 0.202           | 0.085 | 1.74E-02 | -0.438         | 0.185 | 1.80E-02 | 1.64E-02   | 20   |
| SLC16A1  | 1         | 113477052 | rs3789592  | 1          | 113471400 | A             | G            | 0.41               | 0.123            | 0.008 | 4.34E-53 | 235.2        | -0.178          | 0.031 | 6.28E-09 | -1.443         | 0.266 | 5.61E-08 | 6.64E-01   | 20   |
| ADRB2    | 5         | 148207176 | rs2082395  | 5          | 148200600 | A             | G            | 0.42               | 0.126            | 0.008 | 6.31E-56 | 248.2        | -0.119          | 0.030 | 8.83E-05 | -0.944         | 0.248 | 1.42E-04 | 7.66E-01   | 5    |
| KCNJ11   | 11        | 17409142  | rs2074310  | 11         | 17421886  | T             | C            | 0.37               | 0.157            | 0.012 | 4.37E-38 | 166.5        | 0.340           | 0.032 | 5.50E-27 | 2.160          | 0.262 | 1.51E-16 | 6.53E-02   | 20   |
| ATP1A1   | 1         | 116934086 | rs6704439  | 1          | 116867616 | A             | C            | 0.27               | 0.041            | 0.009 | 4.39E-06 | 21.1         | 0.147           | 0.035 | 2.39E-05 | 3.567          | 1.148 | 1.88E-03 | 2.09E-01   | 8    |
| SLC9A1   | 1         | 27459389  | rs12751422 | 1          | 27493679  | T             | C            | 0.27               | 0.106            | 0.009 | 1.19E-32 | 141.6        | -0.148          | 0.035 | 2.08E-05 | -1.395         | 0.348 | 6.08E-05 | 9.72E-02   | 20   |
| NR3C1    | 5         | 142736286 | rs4912908  | 5          | 142791133 | G             | A            | 0.23               | 0.073            | 0.010 | 1.07E-13 | 55.2         | 0.094           | 0.038 | 1.20E-02 | 1.296          | 0.545 | 1.74E-02 | 2.92E-01   | 15   |
| CACNA1H  | 16        | 1237506   | rs35198836 | 16         | 1244631   | T             | C            | 0.22               | 0.149            | 0.011 | 2.95E-39 | 171.8        | 0.099           | 0.035 | 4.71E-03 | 0.668          | 0.241 | 5.69E-03 | 3.96E-01   | 20   |
| AQP1     | 7         | 30929070  | rs28362721 | 7          | 30957702  | T             | C            | 0.17               | 0.086            | 0.011 | 1.81E-15 | 63.3         | 0.115           | 0.041 | 4.93E-03 | 1.345          | 0.507 | 7.97E-03 | 5.12E-01   | 20   |
| JUN      | 1         | 59248125  | rs2716140  | 1          | 59472397  | C             | A            | 0.40               | -0.228           | 0.008 | 3.5E-177 | 805.5        | 0.126           | 0.031 | 4.63E-05 | -0.551         | 0.137 | 5.58E-05 | 9.09E-02   | 20   |
| CA12     | 15        | 63643968  | rs12909041 | 15         | 63743677  | A             | C            | 0.20               | 0.039            | 0.010 | 0.000114 | 14.9         | 0.090           | 0.038 | 1.92E-02 | 2.319          | 1.158 | 4.53E-02 | 1.08E-02   | 5    |
| CACNA1D  | 3         | 53687586  | rs9830632  | 3          | 53735766  | G             | A            | 0.29               | -0.085           | 0.009 | 2E-22    | 94.9         | 0.207           | 0.034 | 9.24E-10 | -2.427         | 0.468 | 2.14E-07 | 3.93E-01   | 20   |
| CACNA2D2 | 3         | 50470954  | rs62260815 | 3          | 50474624  | A             | G            | 0.11               | -0.142           | 0.013 | 8.98E-29 | 123.9        | -0.116          | 0.049 | 1.67E-02 | 0.814          | 0.348 | 1.94E-02 | 7.93E-02   | 20   |
| PDE1B    | 12        | 54958078  | rs1874308  | 12         | 54954356  | A             | T            | 0.30               | 0.429            | 0.009 | 0.00E+00 | 2301.7       | -0.094          | 0.034 | 5.33E-03 | -0.220         | 0.079 | 5.40E-03 | 7.35E-01   | 20   |
| AHR      | 7         | 17362011  | rs17700436 | 7          | 17167825  | T             | C            | 0.05               | 0.480            | 0.017 | 1.6E-178 | 811.7        | -0.184          | 0.066 | 5.34E-03 | -0.383         | 0.138 | 5.58E-03 | 7.08E-01   | 20   |
| GPR35    | 2         | 241557762 | rs2975788  | 2          | 241571858 | G             | A            | 0.48               | 0.293            | 0.009 | 6.2E-259 | 1181.6       | 0.065           | 0.030 | 3.29E-02 | 0.221          | 0.104 | 3.34E-02 | 7.59E-01   | 20   |
| KCNJ2    | 17        | 68170501  | rs9890133  | 17         | 68169005  | G             | A            | 0.11               | -0.256           | 0.012 | 8.02E-94 | 422.2        | 0.094           | 0.047 | 4.61E-02 | -0.367         | 0.185 | 4.72E-02 | 6.24E-01   | 20   |

Abbreviations: MR, Mendelian randomization, SNP, single nuclear polymorphism, eQTL, expression quantitative trait loci, se, standard error, SBP, systolic blood pressure, HEIDI, heterogeneity in dependent instruments, nsnp, number of SNPs for HEIDI test.

**Supplementary Table 4** Association between SLC12A2 and PDE1B eQTL SNP in blood with expression of other nearby genes

|          | Nearby gene          | Chr       | BP               | Samples      | eQTL SNP          | SNP_BP           | Effect_allele | Other_allele | Freq_Effect_allele | beta          | se           | p               |
|----------|----------------------|-----------|------------------|--------------|-------------------|------------------|---------------|--------------|--------------------|---------------|--------------|-----------------|
| SLC12A2  | <b>CTC-228N24.3</b>  | <b>5</b>  | <b>127347455</b> | <b>22495</b> | <b>rs17764730</b> | <b>127357526</b> | <b>T</b>      | <b>C</b>     | <b>0.227</b>       | <b>-0.503</b> | <b>0.011</b> | <b>0.00E+00</b> |
|          | <b>SLC12A2</b>       | <b>5</b>  | <b>127472419</b> | <b>31644</b> | <b>rs17764730</b> | <b>127357526</b> | <b>T</b>      | <b>C</b>     | <b>0.227</b>       | <b>-0.186</b> | <b>0.009</b> | <b>3.20E-86</b> |
|          | <b>FBN2</b>          | <b>5</b>  | <b>127794239</b> | <b>31684</b> | <b>rs17764730</b> | <b>127357526</b> | <b>T</b>      | <b>C</b>     | <b>0.227</b>       | <b>-0.158</b> | <b>0.009</b> | <b>6.90E-63</b> |
|          | PRRC1                | 5         | 126872041        | 31684        | rs17764730        | 127357526        | T             | C            | 0.227              | -0.019        | 0.009        | 5.01E-02        |
|          | CTC-228N24.1         | 5         | 127158204        | 15590        | rs17764730        | 127357526        | T             | C            | 0.227              | 0.013         | 0.014        | 3.37E-01        |
|          | HNRNPKP1             | 5         | 126847845        | 19056        | rs17764730        | 127357526        | T             | C            | 0.227              | -0.004        | 0.012        | 7.30E-01        |
|          | C5orf63              | 5         | 126393717        | 25262        | rs17764730        | 127357526        | T             | C            | 0.227              | 0.003         | 0.011        | 7.81E-01        |
| PDE1B    | <b>PDE1B</b>         | <b>12</b> | <b>54958078</b>  | <b>28131</b> | <b>rs1874308</b>  | <b>54954356</b>  | <b>A</b>      | <b>T</b>     | <b>0.289</b>       | <b>0.429</b>  | <b>0.009</b> | <b>0.00E+00</b> |
|          | <b>NCKAP1L</b>       | <b>12</b> | <b>54914610</b>  | <b>28131</b> | <b>rs1874308</b>  | <b>54954356</b>  | <b>A</b>      | <b>T</b>     | <b>0.289</b>       | <b>0.038</b>  | <b>0.009</b> | <b>5.00E-05</b> |
|          | <b>RP11-834C11.3</b> | <b>12</b> | <b>54484028</b>  | <b>3827</b>  | <b>rs1874308</b>  | <b>54954356</b>  | <b>A</b>      | <b>T</b>     | <b>0.289</b>       | <b>-0.077</b> | <b>0.025</b> | <b>2.15E-03</b> |
|          | <b>GPR84</b>         | <b>12</b> | <b>54757250</b>  | <b>28131</b> | <b>rs1874308</b>  | <b>54954356</b>  | <b>A</b>      | <b>T</b>     | <b>0.289</b>       | <b>-0.026</b> | <b>0.009</b> | <b>4.92E-03</b> |
|          | <b>SMUG1</b>         | <b>12</b> | <b>54570653</b>  | <b>27382</b> | <b>rs1874308</b>  | <b>54954356</b>  | <b>A</b>      | <b>T</b>     | <b>0.289</b>       | <b>0.022</b>  | <b>0.009</b> | <b>1.83E-02</b> |
|          | RP11-1049A21.2       | 12        | 54937392         | 4652         | rs1874308         | 54954356         | A             | T            | 0.289              | -0.045        | 0.023        | 5.07E-02        |
|          | RP11-968A15.8        | 12        | 54704641         | 3827         | rs1874308         | 54954356         | A             | T            | 0.289              | -0.047        | 0.025        | 6.18E-02        |
|          | HNRNPA1              | 12        | 54677424         | 23056        | rs1874308         | 54954356         | A             | T            | 0.289              | -0.014        | 0.010        | 1.66E-01        |
|          | NFE2                 | 12        | 54690400         | 28131        | rs1874308         | 54954356         | A             | T            | 0.289              | 0.013         | 0.009        | 1.79E-01        |
|          | RP11-968A15.2        | 12        | 54664623         | 4652         | rs1874308         | 54954356         | A             | T            | 0.289              | 0.031         | 0.023        | 1.82E-01        |
|          | ATF7                 | 12        | 53960919         | 11154        | rs1874308         | 54954356         | A             | T            | 0.289              | 0.019         | 0.015        | 1.97E-01        |
|          | RP11-753H16.5        | 12        | 54804172         | 4018         | rs1874308         | 54954356         | A             | T            | 0.289              | 0.029         | 0.025        | 2.34E-01        |
|          | ITGA5                | 12        | 54801144         | 28131        | rs1874308         | 54954356         | A             | T            | 0.289              | 0.011         | 0.009        | 2.52E-01        |
|          | ZNF385A              | 12        | 54773999         | 28131        | rs1874308         | 54954356         | A             | T            | 0.289              | -0.010        | 0.009        | 2.67E-01        |
|          | RP11-834C11.4        | 12        | 54523254         | 21824        | rs1874308         | 54954356         | A             | T            | 0.289              | -0.011        | 0.011        | 2.86E-01        |
|          | PHC1P1               | 12        | 55806448         | 4526         | rs1874308         | 54954356         | A             | T            | 0.289              | -0.024        | 0.023        | 3.03E-01        |
|          | ATP5G2               | 12        | 54048851         | 28131        | rs1874308         | 54954356         | A             | T            | 0.289              | -0.009        | 0.009        | 3.60E-01        |
|          | HOXC5                | 12        | 54404387         | 27306        | rs1874308         | 54954356         | A             | T            | 0.289              | -0.008        | 0.009        | 3.91E-01        |
|          | COPZ1                | 12        | 54720309         | 28131        | rs1874308         | 54954356         | A             | T            | 0.289              | -0.006        | 0.009        | 5.00E-01        |
|          | HOXC4                | 12        | 54430264         | 22231        | rs1874308         | 54954356         | A             | T            | 0.289              | 0.007         | 0.010        | 5.21E-01        |
|          | RP11-834C11.7        | 12        | 54473154         | 10394        | rs1874308         | 54954356         | A             | T            | 0.289              | -0.009        | 0.015        | 5.55E-01        |
|          | CBX5                 | 12        | 54649305         | 27917        | rs1874308         | 54954356         | A             | T            | 0.289              | -0.004        | 0.009        | 6.70E-01        |
|          | TESPA1               | 12        | 55360166         | 21824        | rs1874308         | 54954356         | A             | T            | 0.289              | -0.004        | 0.011        | 6.97E-01        |
| GTSF1    | 12                   | 54858560  | 11154            | rs1874308    | 54954356          | A                | T             | 0.289        | 0.006              | 0.015         | 7.09E-01     |                 |
| CALCOCO1 | 12                   | 54113216  | 28131            | rs1874308    | 54954356          | A                | T             | 0.289        | -0.003             | 0.009         | 7.19E-01     |                 |

Abbreviations: SNP, single nuclear polymorphism, eQTL, expression quantitative trait loci, se, standard error.

**Supplementary Table 5** MR association between expression of nearby genes of SLC12A2 and PDE1B in blood and risk of breast cancer and ER+ breast cancer

| BC type | Target gene | Nearby gene  | ProbeChr | Probe bp  | topSNP     | topSNP_bp | Effect allele | Other allele | Freq Effect allele | eQTL association |       |           | BC association |       |          | MR association |       |          | HEIDI Test |      | Posterior probability |
|---------|-------------|--------------|----------|-----------|------------|-----------|---------------|--------------|--------------------|------------------|-------|-----------|----------------|-------|----------|----------------|-------|----------|------------|------|-----------------------|
|         |             |              |          |           |            |           |               |              |                    | beta             | se    | p         | beta           | se    | p        | beta           | se    | p        | p_HEIDI    | nsnp |                       |
| Any BC  | SLC12A2     | CTC-228N24.3 | 5        | 127347455 | rs6888037  | 127406259 | G             | T            | 0.21               | -0.508           | 0.011 | 0.00E+00  | 0.027          | 0.007 | 1.09E-04 | -0.054         | 0.014 | 1.15E-04 | 1.45E-01   | 20   | 77%                   |
|         |             | SLC12A2      | 5        | 127472419 | rs17764730 | 127357526 | T             | C            | 0.21               | -0.186           | 0.009 | 3.20E-86  | 0.028          | 0.007 | 7.57E-05 | -0.150         | 0.039 | 1.05E-04 | 1.56E-01   | 20   | 81.50%                |
|         |             | FBN2         | 5        | 127794239 | rs79813368 | 127921198 | A             | G            | 0.05               | 1.262            | 0.013 | 0.00E+00  | -0.003         | 0.011 | 7.71E-01 | -0.002         | 0.009 | 7.71E-01 | 9.98E-01   | 20   | 0.33%                 |
| ER+ BC  | SLC12A2     | CTC-228N24.3 | 5        | 127347455 | rs6888037  | 127406259 | G             | T            | 0.21               | -0.508           | 0.011 | 0.00E+00  | 0.029          | 0.009 | 7.99E-04 | -0.057         | 0.017 | 8.48E-04 | 1.70E-01   | 20   | 40.40%                |
|         |             | SLC12A2      | 5        | 127472419 | rs17764730 | 127357526 | T             | C            | 0.21               | -0.186           | 0.009 | 3.20E-86  | 0.029          | 0.009 | 6.96E-04 | -0.158         | 0.048 | 8.67E-04 | 1.23E-01   | 20   | 40.46%                |
|         |             | FBN2         | 5        | 127794239 | rs79813368 | 127921198 | A             | G            | 0.05               | 1.262            | 0.013 | 0.00E+00  | -0.004         | 0.013 | 7.78E-01 | -0.003         | 0.011 | 7.75E-01 | 1.00E+00   | 20   | 0.42%                 |
|         | PDE1B       | PDE1B        | 12       | 54958078  | rs1874308  | 54954356  | A             | T            | 0.39               | 0.429            | 0.009 | 0.00E+00  | 0.030          | 0.008 | 3.38E-04 | 0.070          | 0.019 | 3.28E-04 | 2.37E-01   | 14   | 66.80%                |
|         |             | NCKAP1L      | 12       | 54914610  | rs11609712 | 54890515  | A             | C            | 0.12               | 0.187            | 0.009 | 5.93E-100 | 0.010          | 0.009 | 2.69E-01 | 0.053          | 0.049 | 2.72E-01 | 1.03E-01   | 20   | 0.62%                 |
|         |             | GPR84        | 12       | 54757250  | rs3809161  | 54758330  | A             | G            | 0.50               | 0.222            | 0.008 | 3.93E-175 | -0.015         | 0.008 | 6.21E-02 | -0.067         | 0.036 | 6.16E-02 | 4.08E-01   | 20   | 1.67%                 |
|         |             | SMUG1        | 12       | 54570653  | rs2233921  | 54575800  | A             | C            | 0.32               | -0.344           | 0.008 | 0.00E+00  | -0.005         | 0.008 | 5.29E-01 | 0.014          | 0.022 | 5.31E-01 | 1.42E-01   | 20   | 0.34%                 |

Abbreviations: MR, Mendelian randomization, SNP, single nuclear polymorphism, eQTL, expression quantitative trait loci, se, standard error, BC, breast cancer, HEIDI, heterogeneity in dependent instruments, nsnp, number of SNPs for HEIDI test.

**Supplementary Table 6** MR association between drug targeted gene expression in other tissue and overall risk of breast cancer

| Tissue                         | Gene    | Gene chr | Gene_start | topSNP         | topSNP_bp | Effect allele | Other allele | Freq Effect allele | eQTL association |       |          | BC association |       |          | MR association |       |          | HEIDI Test |      |
|--------------------------------|---------|----------|------------|----------------|-----------|---------------|--------------|--------------------|------------------|-------|----------|----------------|-------|----------|----------------|-------|----------|------------|------|
|                                |         |          |            |                |           |               |              |                    | beta             | se    | p        | beta           | se    | p        | beta           | se    | p        | p_HEIDI    | nsnp |
| Adrenal Gland                  | KCNH2   | 7        | 150944961  | chr7_150901391 | 150901391 | C             | T            | 0.452              | -0.353           | 0.058 | 1.51E-09 | 0.017          | 0.010 | 1.09E-01 | -0.047         | 0.031 | 1.22E-01 | 2.49E-01   | 20   |
|                                | CACNA1H | 16       | 1153121    | chr16_1137931  | 1137931   | T             | C            | 0.408              | -0.447           | 0.061 | 3.10E-13 | -0.008         | 0.017 | 6.17E-01 | 0.019          | 0.037 | 6.18E-01 | 3.04E-01   | 12   |
| Breast Mammary                 | GPR35   | 2        | 240605431  | chr2_240621671 | 240621671 | T             | G            | 0.359              | -0.378           | 0.041 | 9.62E-21 | -0.025         | 0.014 | 7.97E-02 | 0.065          | 0.038 | 8.50E-02 | 8.58E-01   | 13   |
|                                | PDE1B   | 12       | 54549350   | chr12_54561540 | 54561540  | C             | T            | 0.693              | 0.310            | 0.027 | 9.15E-30 | -0.038         | 0.011 | 6.26E-04 | -0.122         | 0.037 | 1.06E-03 | 4.72E-01   | 11   |
| Kidney Cortex                  | ACE     | 17       | 63477061   | chr17_63482264 | 63482264  | G             | A            | 0.633              | 0.565            | 0.103 | 4.16E-08 | -0.008         | 0.010 | 4.28E-01 | -0.014         | 0.018 | 4.33E-01 | NA         | NA   |
| Muscle Skeletal                | GPR35   | 2        | 240605431  | chr2_240621671 | 240621671 | T             | G            | 0.359              | -0.438           | 0.037 | 2.14E-32 | -0.025         | 0.014 | 7.97E-02 | 0.056          | 0.032 | 8.30E-02 | 6.89E-01   | 12   |
|                                | SLC12A2 | 5        | 128083766  | chr5_128146900 | 128146900 | G             | A            | 0.190              | 0.203            | 0.032 | 1.88E-10 | -0.017         | 0.013 | 1.98E-01 | -0.084         | 0.067 | 2.07E-01 | 6.30E-02   | 18   |
|                                | KCNJ11  | 11       | 17385859   | chr11_17374886 | 17374886  | C             | CCTTTAAT     | 0.218              | -0.152           | 0.026 | 7.82E-09 | -0.007         | 0.013 | 6.03E-01 | 0.043          | 0.083 | 6.04E-01 | 4.00E-01   | 13   |
|                                | ASIC1   | 12       | 50057548   | chr12_50068355 | 50068355  | C             | T            | 0.327              | -0.189           | 0.034 | 1.99E-08 | -0.007         | 0.012 | 5.68E-01 | 0.036          | 0.063 | 5.70E-01 | 1.45E-01   | 17   |
| Ovary                          | GPR35   | 2        | 240605431  | chr2_240621671 | 240621671 | T             | G            | 0.359              | -0.523           | 0.063 | 8.97E-17 | -0.025         | 0.014 | 7.97E-02 | 0.047          | 0.027 | 8.64E-02 | 6.79E-01   | 4    |
|                                | KCNH2   | 7        | 150944961  | chr7_150849357 | 150849357 | T             | C            | 0.033              | -1.095           | 0.189 | 6.86E-09 | -0.007         | 0.029 | 8.20E-01 | 0.006          | 0.026 | 8.20E-01 | 8.52E-01   | 16   |
|                                | ASIC1   | 12       | 50057548   | chr12_50089249 | 50089249  | A             | G            | 0.325              | -0.391           | 0.069 | 1.75E-08 | -0.009         | 0.012 | 4.32E-01 | 0.024          | 0.031 | 4.36E-01 | 2.16E-01   | 20   |
| Small Intestine Terminal Ileum | GPR35   | 2        | 240605431  | chr2_240621671 | 240621671 | T             | G            | 0.359              | -0.261           | 0.038 | 4.18E-12 | -0.025         | 0.014 | 7.97E-02 | 0.094          | 0.055 | 8.93E-02 | 1.61E-01   | 3    |
| Uterus                         | NONE    |          |            |                |           |               |              |                    |                  |       |          |                |       |          |                |       |          |            |      |

**Supplementary Table 7** Causal association between systolic blood pressure (exposure) and risk of breast cancer (outcome)

| Method                    | Number of SNPs | beta    | se     | OR    | 95% CI      | p      |
|---------------------------|----------------|---------|--------|-------|-------------|--------|
| GSMR                      | 521            | -0.0310 | 0.0171 | 0.969 | 0.938-1.002 | 0.0693 |
| MR Egger                  | 745            | -0.0095 | 0.0043 | 0.991 | 0.982-0.999 | 0.0295 |
| Weighted median           | 745            | 0.0004  | 0.0017 | 1.000 | 0.997-1.004 | 0.8306 |
| Inverse variance weighted | 745            | -0.0002 | 0.0016 | 1.000 | 0.997-1.003 | 0.9178 |
| Simple mode               | 745            | 0.0005  | 0.0061 | 1.000 | 0.989-1.013 | 0.9359 |
| Weighted mode             | 745            | 0.0005  | 0.0038 | 1.000 | 0.993-1.008 | 0.8971 |

Abbreviations: se, standard error, SNP, single nucleotide polymorphism, OR odds ratio, CI confidence intervals

**Supplementary Table 8** Comparison of gene expression of SLC12A2 between breast cancer patients and controls in Expression Atlas

| <b>Experiment accession</b> | <b>Comparison (normal as reference)</b>      | <b>Sample part</b> | <b>Log<sub>2</sub> fold change</b> | <b>Adjusted p-value</b> |
|-----------------------------|----------------------------------------------|--------------------|------------------------------------|-------------------------|
| E-GEOD-68086                | 'breast carcinoma' vs 'normal'               | blood platelet     | -3.3                               | 7.70E-24                |
| E-GEOD-31138                | invasive ductal carcinoma' vs 'normal'       | breast             | 2.5                                | 0.02863135              |
| E-GEOD-45581                | 'non-inflammatory breast cancer' vs 'normal' | breast             | -1.5                               | 0.029033235             |
| E-GEOD-54002                | 'breast cancer' vs 'normal'                  | mammary gland      | -1.4                               | 1.23364E-05             |
| E-GEOD-38959                | 'breast cancer; breast' vs 'normal; breast'  | breast             | -1.3                               | 0.017083027             |
